# Supplementary material for: Quantitative structure–property relationship of the photoelectrochemical oxidation of phenolic pollutants at modified nanoporous titanium oxide using supervised machine learning
Source: Royal Society of Chemistry journal article supplement (doi:10.1039/d0cp01518k), 2020-01-01
Supplement: d0cp01518k1.pdf [file d0cp01518k1.pdf]

## Electronic Supplementary Information

# Quantitative structure-property relationship of the photoelectrochemical oxidation of phenolic pollutants at modified nanoporous titanium oxide using supervised machine learning

Jesse S. Dondapati and Aicheng Chen\*

Electrochemical Technology Center, Department of Chemistry, University of Guelph, Guelph, Ontario N1G 2W1, Canada.

\* Corresponding Author. Email: aicheng@uoguelph.ca

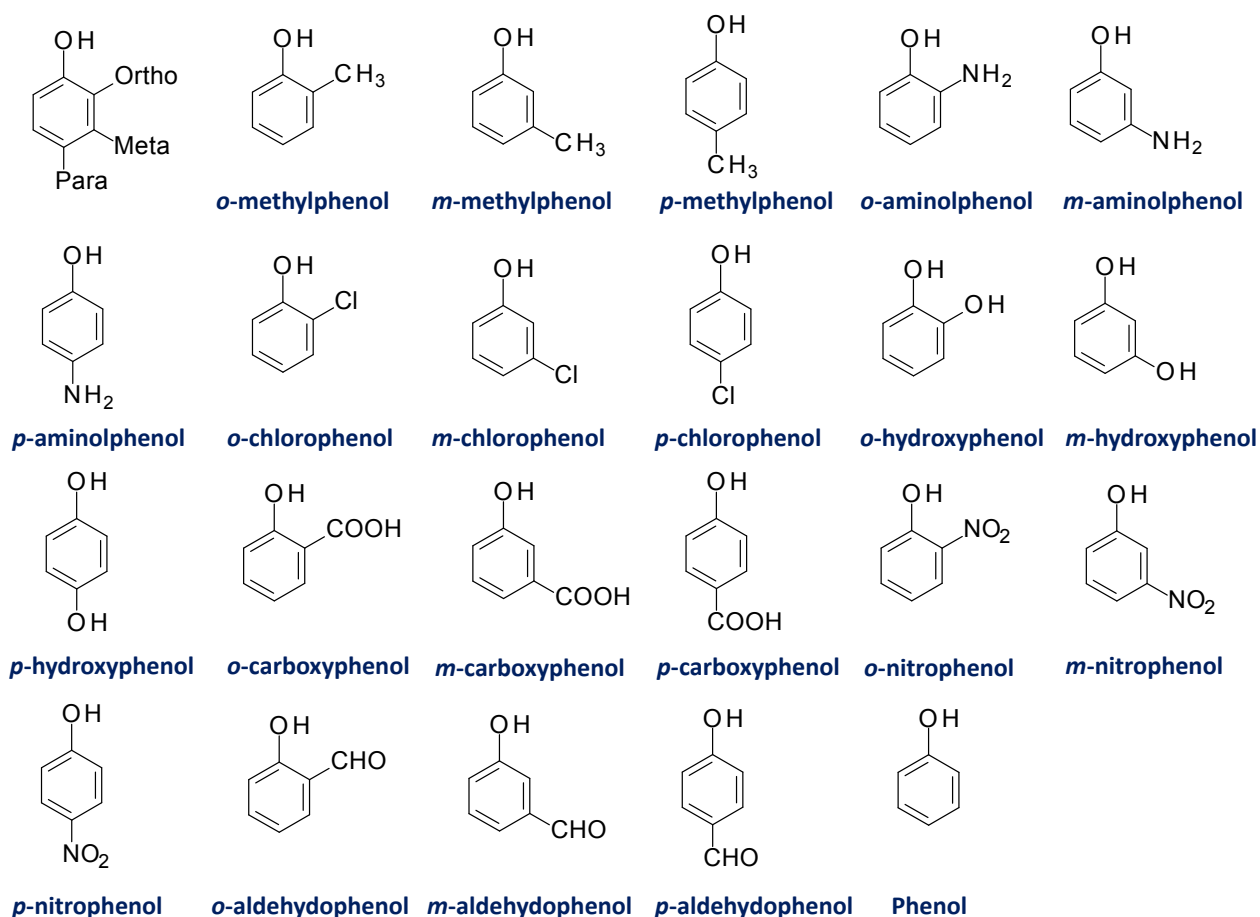

**Figure S1:** The set of 22 (*o*-, *m*-, *p*-) substituted phenolic compounds used for the experimental degradation rate constants and computational QSPR modelling study

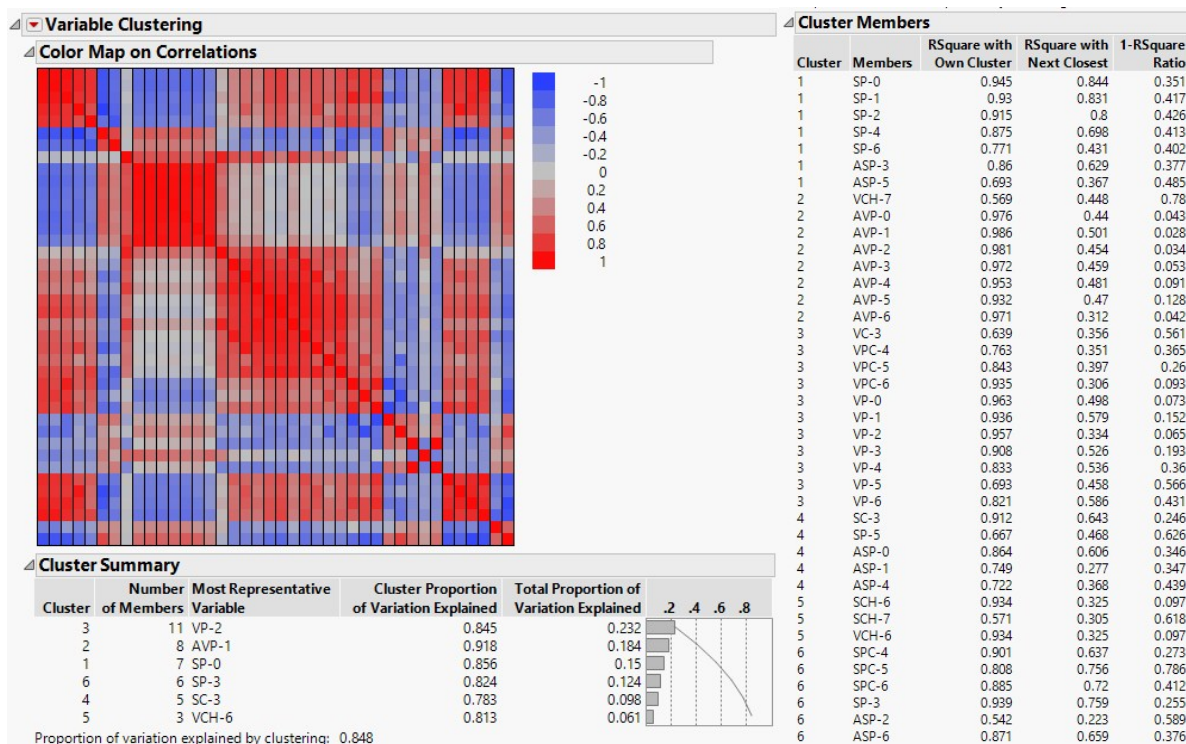

**Figure S2:** The variable clustering analysis of the connectivity descriptors (Kier and Hall Chi Path Cluster Indices) shows a high correlation (Red) among some of the descriptors.

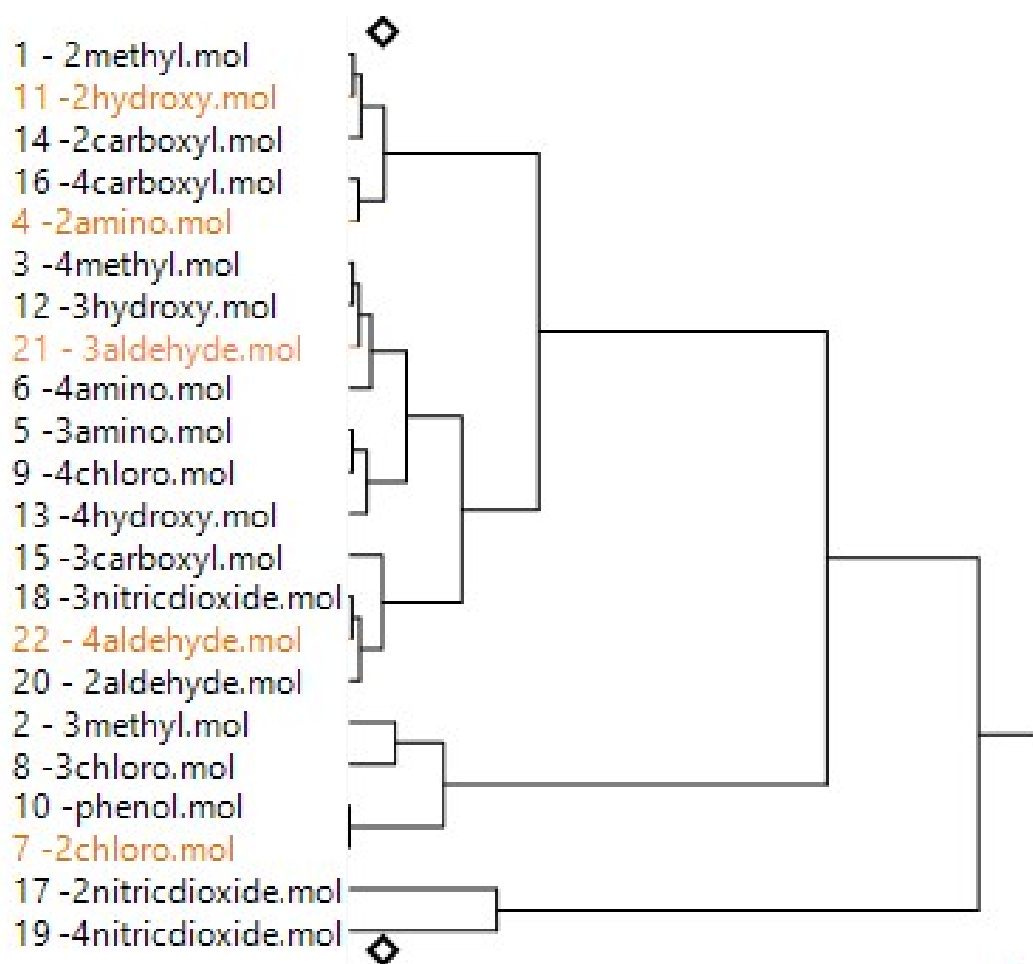

**Figure S3:** A dendrogram of the experimental rate constants of 22 phenolic compounds used in the study.

Note: The dendrogram was generated using the hierarchical clustering analysis (HCA) tool available in the JMP v13 statistical software. The HCA dendrogram is generated based on the distance or closeness of the degradation rate constants to each other. The dendrogram spans the range of slowest to the fastest degrading phenols. This tool is useful for selection of test set spanning the entire range as shown above.

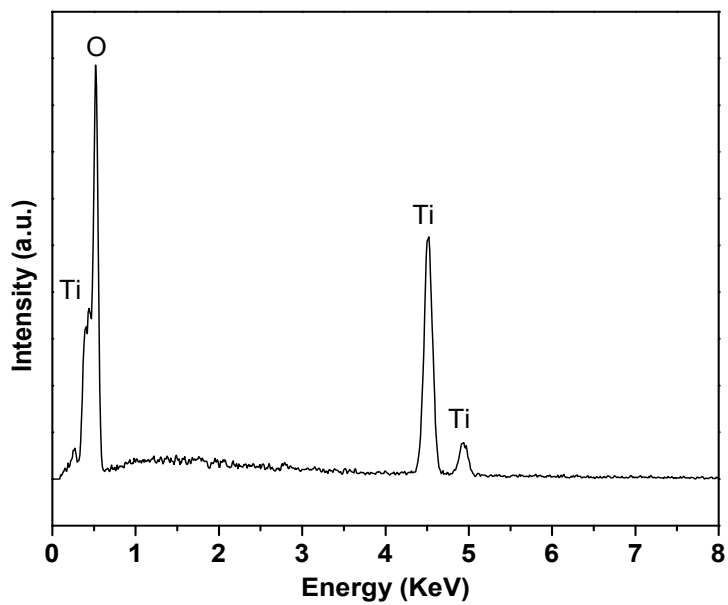

**Figure S4:** The energy dispersive X-ray spectroscopy (EDS) spectrum of the formed nanoporous TiO<sub>2</sub> electrode.

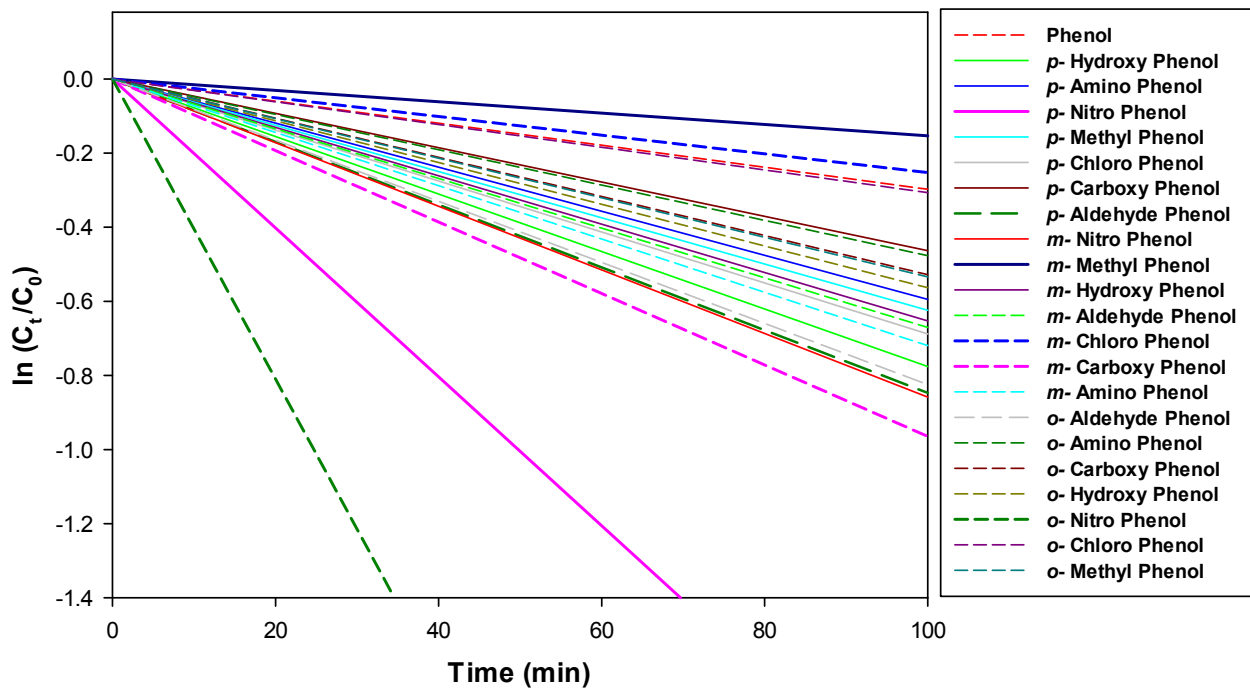

**Figure S5:** Typical kinetic plots representing the degradation rate, plotted as  $\ln(C_t/C_0)$  vs. time of degradation for all the 22 phenolic compounds in the dataset.

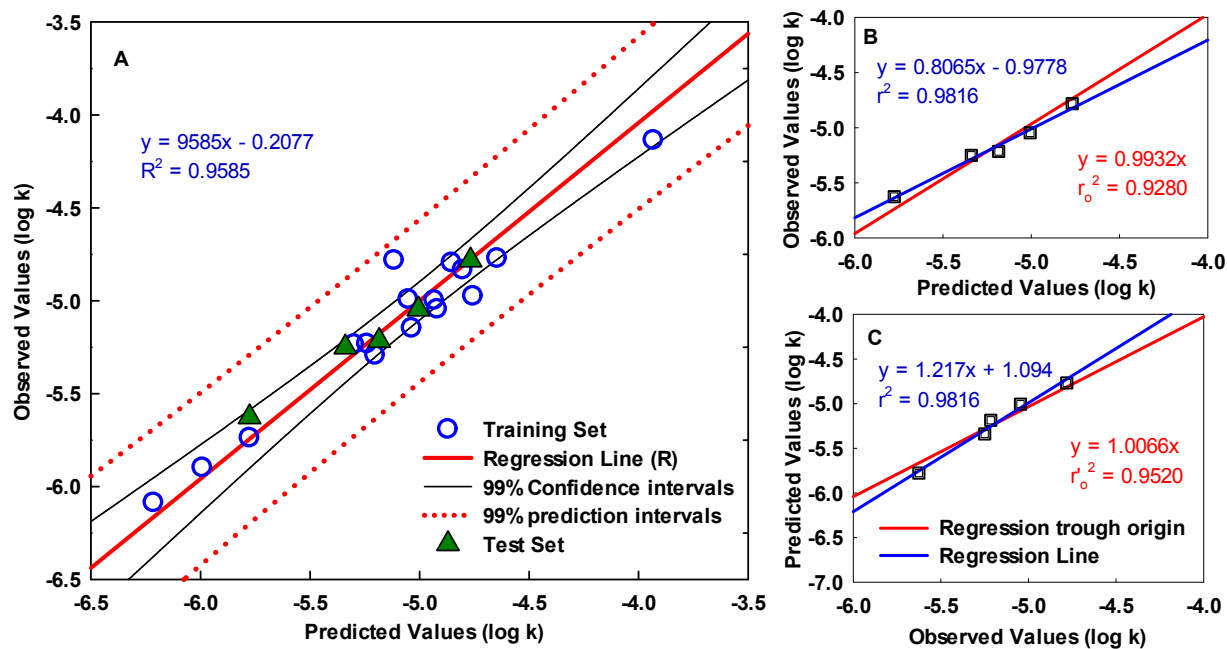

**Figure S6:** Collinearity of the data in QSPR Model I (A) Observed vs predicted values of training set overlaid with test set values; (B) Predicted vs observed plot with  $r^2$  and  $r_o^2$ ; (C) Observed vs predicted plot showing  $r^2$  and  $r_o^2$  corresponding to regression lines drawn from intercept and through origin, respectively.

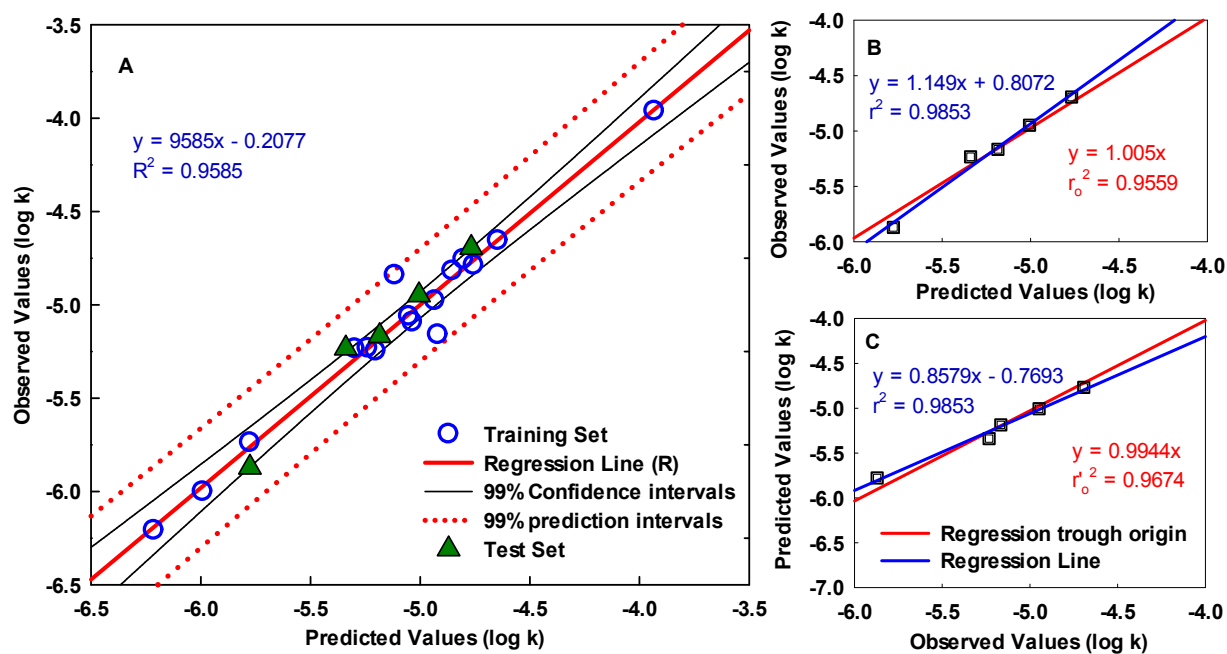

**Figure S7:** Collinearity of the data in QSPR Model II (A) Observed vs predicted values of training set overlaid with test set values; (B) Predicted vs observed plot with  $r^2$  and  $r_o^2$ ; (C) Observed vs predicted plot showing  $r^2$  and  $r_o^2$  corresponding to regression lines drawn from intercept and through origin, respectively.

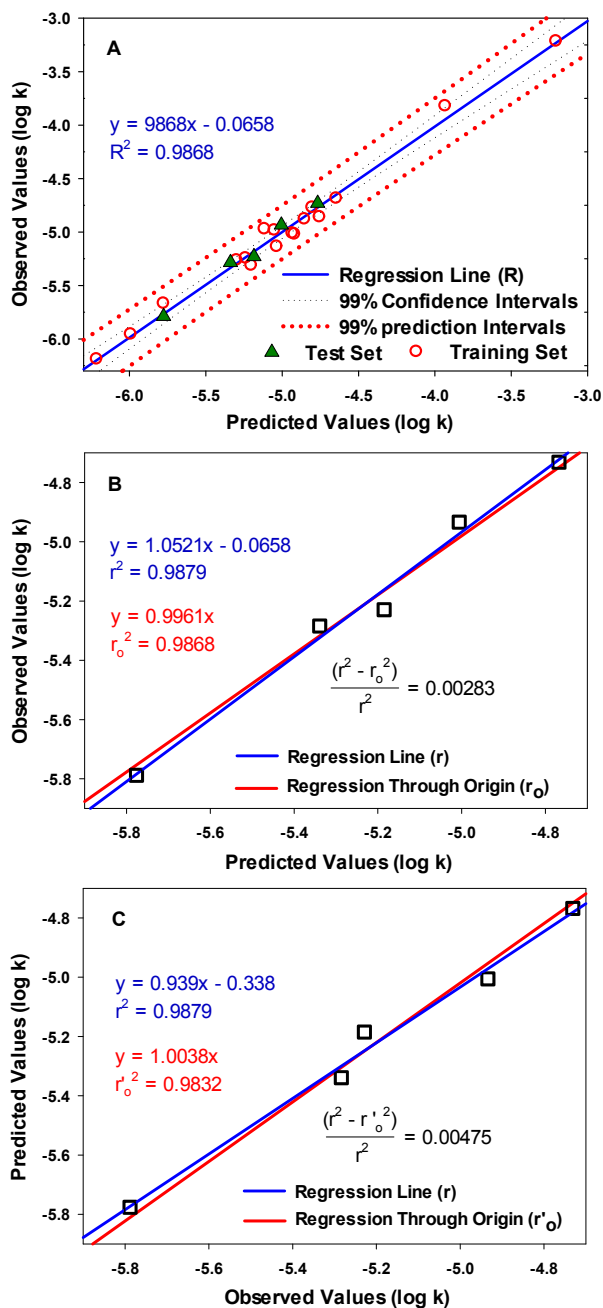

**Figure S8:** Collinearity of the data in QSPR Model III (A) Observed vs predicted values of training set overlaid with test set values; (B) Predicted vs observed plot with  $r^2$  and  $r_o^2$ ; (C) Observed vs predicted plot showing  $r^2$  and  $r_o'^2$  corresponding to regression lines drawn from intercept and through origin, respectively.



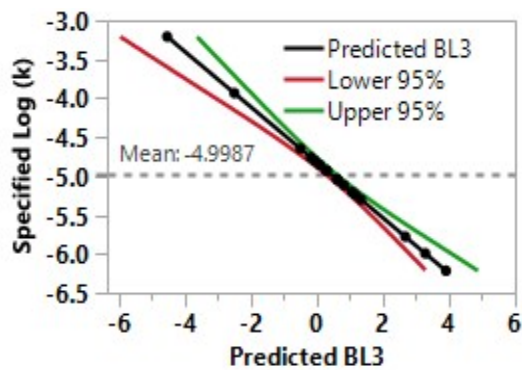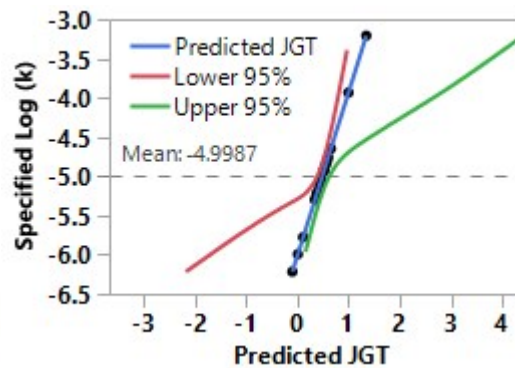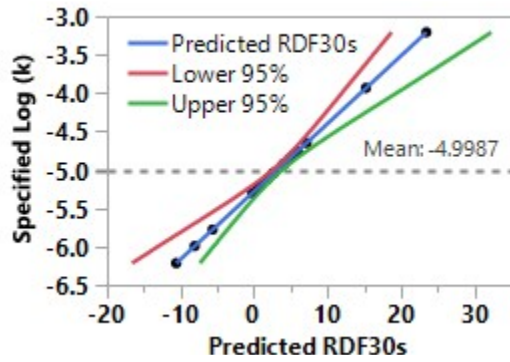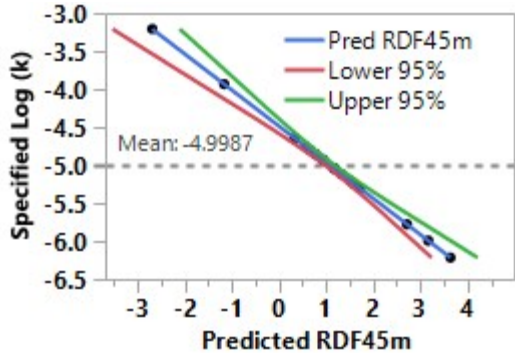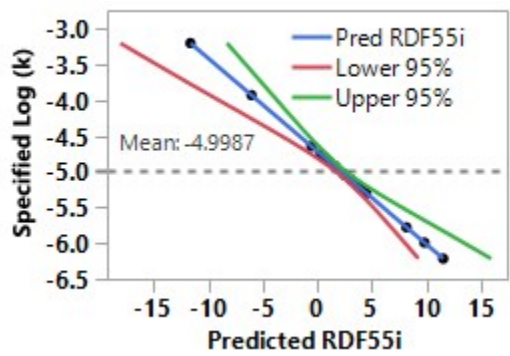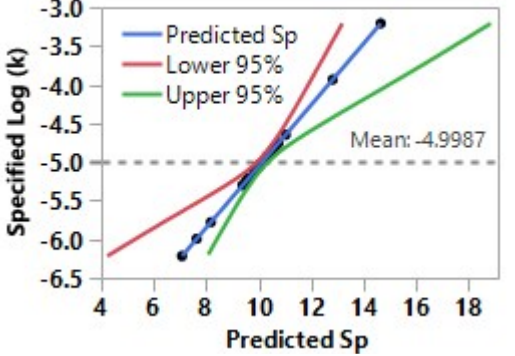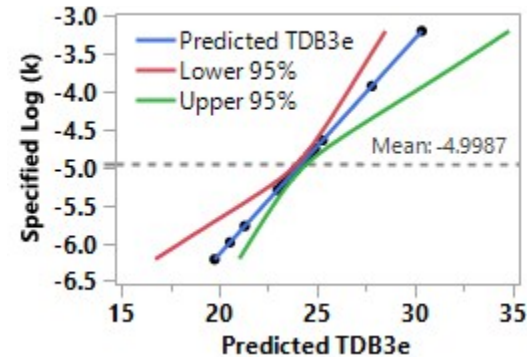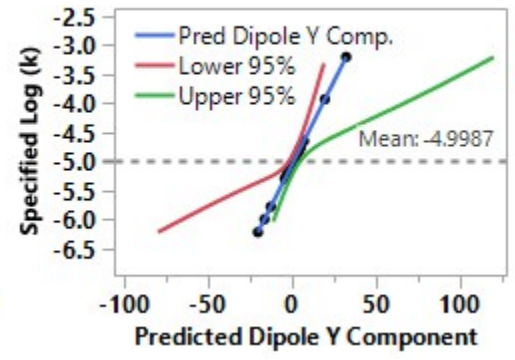

**Figure S9:** Lower and upper confidence intervals for the individual significant descriptors inversely predicted from their observed variables (Log k) and its mean value (-4.9987) intersection shows the least error on the predicted descriptors.

**Table S1:** The list of connectivity descriptor type clusters such as Chi Chain, Chi cluster, Chi path cluster and Chi path, that were included in the data prior to dimension reduction process.

| <b>Descriptor Type</b> | <b>No. of descriptors</b> | <b>Individual descriptors</b>                                                                                                                                                                                  |
|------------------------|---------------------------|----------------------------------------------------------------------------------------------------------------------------------------------------------------------------------------------------------------|
| Chi chain              | 10                        | SCH-3, SCH-4, SCH-5, SCH-6, SCH-7, VCH-3, VCH-4, VCH-5, VCH-6, VCH-7                                                                                                                                           |
| Chi cluster            | 8                         | SC-3, SC-4, SC-5, SC-6, VC-3, VC-4, VC-5, VC-6                                                                                                                                                                 |
| Chi path cluster       | 6                         | SPC-4, SPC-5, SPC-6, VPC-4, VPC-5, VPC-6                                                                                                                                                                       |
| Chi path               | 32                        | SP-0, SP-1, SP-2, SP-3, SP-4, SP-5, SP-6, SP-7, ASP-0, ASP-1, ASP-2, ASP-3, ASP-4, ASP-5, ASP-6, ASP-7, VP-0, VP-1, VP-2, VP-3, VP-4, VP-5, VP-6, VP-7, AVP-0, AVP-1, AVP-2, AVP-3, AVP-4, AVP-5, AVP-6, AVP-7 |

**Note:** In the table S1, an example of untreated data relating to the molecular connectivity descriptor types in four clusters are presented. In our study, since the isomers of substituted phenols are structurally comparable to an extent, such clusters tend to generate highly correlated descriptors. Therefore, a high correlation filter method is adopted as one of the dimensionality reduction methods, which was employed using variable clustering tool of JMP v13. Most of the variables used in the study were originally calculated as groups or clusters as shown above. The list of the available descriptors type cluster that can be calculated with PaDEL Descriptors v2.0 software can be found at:

<http://www.yapcwsoft.com/dd/padeldescriptor/Descriptors.xls>

**Table S2:** An example of intercorrelations between the representative descriptor types selected from the variable clustering analysis is provided below.

|              | <b>SC-3</b> | <b>SP-1</b> | <b>VP-2</b> | <b>AVP-6</b> | <b>Sp</b> |
|--------------|-------------|-------------|-------------|--------------|-----------|
| <b>SC-3</b>  | 1           |             |             |              |           |
| <b>SP-1</b>  | 0.737       | 1           |             |              |           |
| <b>VP-2</b>  | 0.563       | 0.471       | 1           |              |           |
| <b>AVP-6</b> | -0.368      | -0.594      | 0.393       | 1            |           |
| <b>Sp</b>    | 0.472       | 0.591       | 0.689       | 0.001        | 1         |

**NOTE:** The Variable clustering analysis identifies clusters of highly correlated descriptors as shown in Figure S2. We were able to select individual representative descriptors from each cluster to represent each cluster type and the overall intercorrelation is maintained below 0.75.

**Table S3:** List of descriptors used in building the QSPR Models I to IV.

| <b>S.No</b> | <b>Descriptor Types</b>       | <b>Number</b> | <b>Descriptors used in this study</b>  |
|-------------|-------------------------------|---------------|----------------------------------------|
| 1           | Bond Lipophilicity (Subst. x) | 4             | BL (S1), BL (S2), BL (S3), and BL (S4) |

|    |                                       |   |                                                                                        |
|----|---------------------------------------|---|----------------------------------------------------------------------------------------|
| 2  | Dipole                                | 4 | Dipole components (x, y and z), Total Dipole                                           |
| 3  | Bond Dipole (Subst. x)                | 4 | BD (S1), BD (S2), BD (S3), and BD (S4)                                                 |
| 4  | Bond Molar Refractivity               | 4 | BMR (S1), BMR (S2), BMR (S3), and BMR (S4)                                             |
| 5  | Quantum descriptors                   | 4 | HOMO, LUMO, Electronic energy, Mean polarizability                                     |
| 6  | Quantum derived descriptors           | 3 | Chemical potential ( $\mu$ ), hardness ( $\eta$ ), Electrophilicity index ( $\omega$ ) |
| 7  | 3D autocorrelation                    | 4 | TDB1e, TDB2e, TDB3e, and TDB4e                                                         |
| 8  | Charged partial surface area          | 3 | RPCG, WNSA-2 and WNSA-3                                                                |
| 9  | Molecular linear free energy relation | 3 | MLFER_A, MLFER_E, MLFER_L                                                              |
| 10 | Length over breadth                   | 2 | LOBMIN, LOBMAX                                                                         |
| 11 | RDF                                   | 4 | RDF45m, RDF20e, RDF55i, RDF30s                                                         |
| 12 | WHIM                                  | 7 | Ti, Ai, Ki, Di, L1s, L2s, and L3s                                                      |
| 13 | Chi path cluster                      | 2 | SPC-4, SPC-5,                                                                          |
| 14 | Chi path                              | 3 | SP-1, SP-5, ASP-6                                                                      |
| 15 | Chi Cluster                           | 3 | SC-3, SC-4, SC-5                                                                       |
| 16 | Constitutional                        | 1 | Sp                                                                                     |
| 17 | Crippen logP and MR                   | 2 | CrippenLogP, CrippenMR                                                                 |
| 18 | Detour matrix                         | 1 | SpMAD_Dt                                                                               |
| 19 | Information content                   | 3 | SIC0, SIC1, SIC2                                                                       |
| 20 | Topological charge                    | 1 | JGT                                                                                    |
| 21 | Topological distance matrix           | 1 | SpMAD_D                                                                                |

---

**Table S4 (a):** The complete set of descriptors and 22-member dataset comprising phenolic compounds and experimental the rate constants (Log k) used for the development of Model I and II.

| Substituted Phenols       | Log (k)  | BL1      | BL2      | BL3      | BL4      | TDN3e   | RPCG    | LOBMIN  | RDF45m  | RDF20e  | RDF55i  | RDF30s  | Ti      | Ki      | Di      | L2s     |
|---------------------------|----------|----------|----------|----------|----------|---------|---------|---------|---------|---------|---------|---------|---------|---------|---------|---------|
| <i>o</i> -CH <sub>3</sub> | -5.20301 | 0.10505  | 1.48521  | 0.36253  | 0.362736 | 22.9    | 0.34701 | 1.07162 | 0.41398 | 3.21731 | 1.93146 | 0.2338  | 5.50297 | 0.46919 | 1.32577 | 1.87669 |
| <i>m</i> -CH <sub>3</sub> | -6.21461 | 0.108225 | 0.362003 | 1.4847   | 0.362578 | 22.9203 | 0.34703 | 1.43382 | 0.28771 | 3.13776 | 7.38264 | 0.14948 | 5.78351 | 0.47069 | 1.30471 | 2.08197 |
| <i>p</i> -CH <sub>3</sub> | -5.05146 | 0.108135 | 0.36227  | 0.362533 | 1.48455  | 22.9202 | 0.34712 | 1.27242 | 0.45179 | 3.13722 | 2.45102 | 0.14957 | 5.9786  | 0.55018 | 1.21035 | 1.56327 |
| <i>o</i> -NH <sub>2</sub> | -5.33914 | 0.150888 | -0.80134 | 0.3621   | 0.362606 | 23.3764 | 0.25602 | 1.10092 | 0.56208 | 4.53568 | 1.69361 | 0.68491 | 5.19918 | 0.48844 | 1.32033 | 1.94029 |
| <i>m</i> -NH <sub>2</sub> | -4.93367 | 0.109288 | 0.361585 | -0.79758 | 0.362173 | 23.3362 | 0.26853 | 1.39658 | 0.4071  | 4.01727 | 2.51527 | 0.6232  | 5.39532 | 0.48957 | 1.30238 | 2.15584 |
| <i>p</i> -NH <sub>2</sub> | -5.116   | 0.108804 | 0.362176 | 0.36214  | -0.79786 | 23.3361 | 0.26975 | 1.2229  | 0.59555 | 4.01674 | 0.72863 | 0.62334 | 5.5591  | 0.52701 | 1.17385 | 1.60045 |
| <i>o</i> -Cl              | -5.77635 | 0.114324 | 1.68388  | 0.362427 | 0.362816 | 24.9215 | 0.32525 | 1.11165 | 2.28996 | 2.13941 | 1.93128 | 2.33847 | 4.88372 | 0.49999 | 1.60893 | 1.89603 |
| <i>m</i> -Cl              | -5.99146 | 0.106971 | 0.361983 | 1.68282  | 0.362472 | 24.7482 | 0.34881 | 1.4732  | 1.30792 | 2.46152 | 2.13714 | 0.23344 | 4.90263 | 0.5     | 1.47488 | 1.99518 |
| <i>p</i> -Cl              | -4.91988 | 0.106583 | 0.362264 | 0.362432 | 1.68275  | 24.7482 | 0.35106 | 1.28392 | 1.41478 | 2.46097 | 0.00261 | 0.23335 | 4.92005 | 0.49999 | 1.42357 | 1.7685  |
| -H                        | -5.77635 | 0.10808  | 0.362165 | 0.362727 | 0.36273  | 22.7875 | 0.35981 | 1.20759 | 0.24993 | 2.76878 | 0.75947 | 0.0801  | 4.63175 | 0.49999 | 1.53852 | 1.76405 |
| <i>o</i> -OH              | -5.18499 | 0.126617 | 0.109771 | 0.362198 | 0.362765 | 24.2802 | 0.24403 | 1.20695 | 0.49113 | 2.53381 | 1.19883 | 0.39129 | 5.02629 | 0.49999 | 1.7268  | 2.02493 |
| <i>m</i> -OH              | -5.03595 | 0.106023 | 0.361651 | 0.106024 | 0.362321 | 24.1634 | 0.25825 | 1.34714 | 0.32526 | 2.81634 | 1.57542 | 0.13554 | 5.10516 | 0.5     | 1.66157 | 2.24982 |
| <i>p</i> -OH              | -4.85363 | 0.107208 | 0.362205 | 0.362205 | 0.107207 | 24.1634 | 0.25964 | 1.22363 | 0.51912 | 2.8158  | 0.41855 | 0.13554 | 5.22875 | 0.49999 | 1.65067 | 1.62881 |
| <i>o</i> -COOH            | -5.24005 | 0.102785 | -0.58883 | 0.362779 | 0.362808 | 24.3135 | 0.256   | 1.04066 | 2.72253 | 4.12489 | 3.76535 | 6.60291 | 5.68471 | 0.44381 | 1.42122 | 1.87313 |
| <i>m</i> -COOH            | -4.64599 | 0.106764 | 0.362304 | -0.58401 | 0.362758 | 24.3432 | 0.26271 | 1.47453 | 2.0119  | 3.13533 | 3.28196 | 5.7106  | 5.93536 | 0.44462 | 1.36603 | 2.05147 |
| <i>p</i> -COOH            | -5.29832 | 0.106089 | 0.362227 | 0.362758 | -0.58492 | 24.3472 | 0.26336 | 1.3828  | 3.15428 | 3.12154 | 2.19847 | 4.03765 | 6.14505 | 0.5339  | 1.30814 | 1.52987 |
| <i>o</i> -NO <sub>2</sub> | -3.20645 | 0.100699 | 2.63074  | 0.362868 | 0.362946 | 25.3895 | 0.27629 | 1.0488  | 1.43063 | 2.12751 | 1.53086 | 16.7132 | 5.65317 | 0.4537  | 1.33242 | 1.8755  |
| <i>m</i> -NO <sub>2</sub> | -4.75599 | 0.105367 | 0.362431 | 2.6019   | 0.362903 | 25.3493 | 0.29613 | 1.55436 | 0.80684 | 2.44632 | 2.73528 | 6.08372 | 5.98548 | 0.45612 | 1.2773  | 1.87878 |
| <i>p</i> -NO <sub>2</sub> | -3.93223 | 0.104488 | 0.362394 | 0.362885 | 2.59969  | 25.3491 | 0.29791 | 1.60773 | 0.78667 | 2.44563 | 2.44495 | 6.09304 | 6.06514 | 0.53151 | 1.197   | 1.56303 |
| <i>o</i> -CHO             | -4.80362 | 0.093176 | -0.50968 | 0.36293  | 0.362816 | 23.6502 | 0.25402 | 1.06189 | 1.46844 | 4.41069 | 0.94638 | 5.90671 | 5.38256 | 0.47291 | 1.3548  | 1.86311 |
| <i>m</i> -CHO             | -5.00565 | 0.107083 | 0.362342 | -0.50737 | 0.362657 | 23.6766 | 0.26523 | 1.47189 | 1.28852 | 3.7977  | 3.35894 | 4.29159 | 5.61877 | 0.47383 | 1.32579 | 2.08518 |
| <i>p</i> -CHO             | -4.76769 | 0.105248 | 0.3622   | 0.362605 | -0.50807 | 23.6765 | 0.26621 | 1.11116 | 1.47247 | 3.79701 | 0.44234 | 4.30604 | 5.75496 | 0.52338 | 1.19806 | 1.56202 |

**Table S4 (b):** The complete set of descriptors and 22-member dataset comprising phenolic compounds and experimental the rate constants (Log k) used for the development of Model I and II (continuation to table S4a).

| Substituted Phenols       | Log (k)  | SPC-4   | SPC-5   | SP-1    | SP-5    | Sp      | SpMAD_Dt | SIC0    | SIC1    | SIC2    | JGT     | SpMAD_D |
|---------------------------|----------|---------|---------|---------|---------|---------|----------|---------|---------|---------|---------|---------|
| <i>o</i> -CH <sub>3</sub> | -5.20301 | 1.13807 | 1.04044 | 3.80453 | 1.02438 | 10.6745 | 7.78845  | 0.31795 | 0.67571 | 0.76946 | 0.4566  | 3.82666 |
| <i>m</i> -CH <sub>3</sub> | -6.21461 | 0.74158 | 1.09341 | 3.78769 | 0.97141 | 10.6745 | 7.72933  | 0.31795 | 0.67571 | 0.80071 | 0.46217 | 3.89267 |
| <i>p</i> -CH <sub>3</sub> | -5.05146 | 0.8165  | 0.76008 | 3.78769 | 1.30474 | 10.6745 | 7.67538  | 0.31795 | 0.67571 | 0.73821 | 0.52571 | 3.97205 |
| <i>o</i> -NH <sub>2</sub> | -5.33914 | 1.13807 | 1.04044 | 3.80453 | 1.02438 | 9.93386 | 7.78845  | 0.40001 | 0.69285 | 0.79523 | 0.4566  | 3.82666 |
| <i>m</i> -NH <sub>2</sub> | -4.93367 | 0.74158 | 1.09341 | 3.78769 | 0.97141 | 9.93386 | 7.72933  | 0.40001 | 0.69285 | 0.82936 | 0.46217 | 3.89267 |
| <i>p</i> -NH <sub>2</sub> | -5.116   | 0.8165  | 0.76008 | 3.78769 | 1.30474 | 9.93386 | 7.67538  | 0.40001 | 0.69285 | 0.76111 | 0.52571 | 3.97205 |
| <i>o</i> -Cl              | -5.77635 | 1.13807 | 1.04044 | 3.80453 | 1.02438 | 9.78202 | 7.78845  | 0.43625 | 0.6674  | 0.75055 | 0.4566  | 3.82666 |
| <i>m</i> -Cl              | -5.99146 | 0.74158 | 1.09341 | 3.78769 | 0.97141 | 9.78202 | 7.72933  | 0.43625 | 0.6674  | 0.79212 | 0.46217 | 3.89267 |
| <i>p</i> -Cl              | -4.91988 | 0.8165  | 0.76008 | 3.78769 | 1.30474 | 9.78202 | 7.67538  | 0.43625 | 0.6674  | 0.75055 | 0.52571 | 3.97205 |
| -H                        | -5.77635 | 0.40825 | 0.43301 | 3.39385 | 0.90105 | 8.8759  | 7.37476  | 0.35518 | 0.51733 | 0.61825 | 0.34702 | 3.47727 |
| <i>o</i> -OH              | -5.18499 | 1.13807 | 1.04044 | 3.80453 | 1.02438 | 9.35614 | 7.78845  | 0.38053 | 0.58727 | 0.66231 | 0.4566  | 3.82666 |
| <i>m</i> -OH              | -5.03595 | 0.74158 | 1.09341 | 3.78769 | 0.97141 | 9.35614 | 7.72933  | 0.38053 | 0.58727 | 0.69983 | 0.46217 | 3.89267 |
| <i>p</i> -OH              | -4.85363 | 0.8165  | 0.76008 | 3.78769 | 1.30474 | 9.35614 | 7.67538  | 0.38053 | 0.58727 | 0.58727 | 0.52571 | 3.97205 |
| <i>o</i> -COOH            | -5.24005 | 1.49827 | 2.17456 | 4.71521 | 1.34172 | 10.8364 | 8.49743  | 0.37631 | 0.6875  | 0.8125  | 0.47576 | 4.68875 |
| <i>m</i> -COOH            | -4.64599 | 1.38961 | 1.52281 | 4.69838 | 1.5721  | 10.8364 | 8.38223  | 0.37631 | 0.6875  | 0.84375 | 0.48957 | 4.81311 |
| <i>p</i> -COOH            | -5.29832 | 1.44869 | 1.40419 | 4.69838 | 1.44914 | 10.8364 | 8.27711  | 0.37631 | 0.6875  | 0.78125 | 0.54043 | 4.95891 |
| <i>o</i> -NO <sub>2</sub> | -3.20645 | 1.49827 | 2.17456 | 4.71521 | 1.34172 | 10.0958 | 8.49743  | 0.4561  | 0.72698 | 0.82936 | 0.47576 | 4.68875 |
| <i>m</i> -NO <sub>2</sub> | -4.75599 | 1.38961 | 1.52281 | 4.69838 | 1.5721  | 10.0958 | 8.38223  | 0.4561  | 0.72698 | 0.86349 | 0.48957 | 4.81311 |
| <i>p</i> -NO <sub>2</sub> | -3.93223 | 1.44869 | 1.40419 | 4.69838 | 1.44914 | 10.0958 | 8.27711  | 0.4561  | 0.72698 | 0.79523 | 0.54043 | 4.95891 |
| <i>o</i> -CHO             | -4.80362 | 1.06904 | 1.40829 | 4.34254 | 1.20977 | 10.3561 | 8.27027  | 0.36589 | 0.66538 | 0.82936 | 0.43262 | 4.37183 |
| <i>m</i> -CHO             | -5.00565 | 0.8371  | 1.14666 | 4.3257  | 1.33122 | 10.3561 | 8.17583  | 0.36589 | 0.66538 | 0.86349 | 0.43808 | 4.4755  |
| <i>p</i> -CHO             | -4.76769 | 0.90105 | 0.93744 | 4.3257  | 1.37377 | 10.3561 | 8.08958  | 0.36589 | 0.66538 | 0.79523 | 0.47539 | 4.59788 |

**Table S5:** The additional set of descriptors along with the descriptors presented in table S7 that were used for building Model III and IV

| Substituted Phenols       | LUMO     | HOMO     | Total Dipole Moment (WM) | Dipole x component (WM) | Dipole Y Component (WM) | Dipole Z Component (WM) |
|---------------------------|----------|----------|--------------------------|-------------------------|-------------------------|-------------------------|
| <i>o</i> -CH <sub>3</sub> | 0.37027  | -8.99693 | 1.60388                  | 0.408545                | -1.55097                | -0.0048502              |
| <i>m</i> -CH <sub>3</sub> | 0.52257  | -8.5298  | 1.81381                  | -0.878612               | -1.58637                | -0.0372399              |
| <i>p</i> -CH <sub>3</sub> | 0.439251 | -8.26984 | 1.5766                   | 0.404532                | -1.52358                | 0.0270806               |
| <i>o</i> -NH <sub>2</sub> | 0.406952 | -8.64184 | 1.3284                   | 0.75396                 | -1.07911                | -0.178087               |
| <i>m</i> -NH <sub>2</sub> | 0.018625 | -9.33501 | 2.41256                  | -0.942763               | -1.77468                | 1.33498                 |
| <i>p</i> -NH <sub>2</sub> | 0.392482 | -9.02094 | 2.2283                   | -1.5815                 | -0.512377               | 1.48379                 |
| <i>o</i> -Cl              | 0.029431 | -9.25957 | 1.18905                  | 0.603481                | 1.02452                 | 5.67203E-05             |
| <i>m</i> -Cl              | 0.430239 | -8.88123 | 2.2783                   | 2.01121                 | -1.07037                | 0.000960285             |
| <i>p</i> -Cl              | 0.09462  | -9.12453 | 1.32995                  | -1.3279                 | -0.073789               | 0.000092587             |
| -H                        | -1.01333 | -9.95381 | 1.30016                  | -0.663059               | 1.11837                 | -0.000366983            |
| <i>o</i> -OH              | 0.29703  | -8.885   | 2.20221                  | 1.92212                 | -1.0748                 | -0.000709248            |
| <i>m</i> -OH              | -1.15932 | -9.94672 | 1.27095                  | -1.27091                | -0.00981126             | -6.31183E-05            |
| <i>p</i> -OH              | -1.06522 | -10.0725 | 2.20999                  | -1.92527                | 1.08507                 | -0.00018432             |
| <i>o</i> -COOH            | 0.397365 | -9.11437 | 2.63543                  | 2.57548                 | 0.55893                 | -0.000358723            |
| <i>m</i> -COOH            | 0.274362 | -8.98203 | 1.61243                  | 1.56308                 | 0.395874                | -0.000195338            |
| <i>p</i> -COOH            | 0.232847 | -8.73425 | 3.03018                  | -0.857647               | 2.90627                 | -0.000429832            |
| <i>o</i> -NO <sub>2</sub> | -0.59046 | -9.46227 | 6.75076                  | 2.9346                  | 6.07954                 | 0.00126674              |
| <i>m</i> -NO <sub>2</sub> | -0.57358 | -9.5175  | 6.34853                  | 4.04968                 | 4.88917                 | -0.00102094             |
| <i>p</i> -NO <sub>2</sub> | -0.48087 | -9.60834 | 5.42925                  | 1.6224                  | 5.18118                 | -7.59699E-05            |
| <i>o</i> -CHO             | -0.57035 | -9.49494 | 1.70204                  | -0.0223051              | 1.70181                 | 0.0174728               |
| <i>m</i> -CHO             | -0.5396  | -9.4456  | 1.95347                  | 1.9438                  | -0.194156               | 0.000456167             |
| <i>p</i> -CHO             | -0.44573 | -9.49295 | 3.42383                  | -1.67525                | 2.986                   | 0.00190441              |

## JMP Script for building Model I.

The data required for the script to run in JMPv13 is included in table S4(a) and table S4(b) (includes column names as well).

```
Fit Group(  
    Fit Model(  
        Y( :Name( "Log (k)" ) ),  
        Effects( :BL3, :RDF45m, :RDF55i, :RDF30s, :JGT ),  
        Personality( "Standard Least Squares" ),  
        Emphasis( "Minimal Report" ),  
        Run(  
            :Name( "Log (k)" ) << {Summary of Fit( 1 ), Analysis of  
Variance( 1 ),  
            Parameter Estimates( 1 ), Lack of Fit( 0 ),  
            Plot Actual by Predicted( 0 ), Plot Regression( 0 ),  
            Plot Residual by Predicted( 0 ), Plot Studentized Residuals( 0  
) ,  
            Plot Effect Leverage( 0 ), Box Cox Y Transformation( 0 )}  
        )  
    )  
);
```



**Table S6:** Significant descriptors of the selected QSPR models with high predictive ability.

|    | Descriptors                                                                                             | Abbreviated | QSPR<br>Model IV | Rh B    | <i>o</i> - NO <sub>2</sub> | <i>p</i> - NO <sub>2</sub> | <i>o</i> - COOH |
|----|---------------------------------------------------------------------------------------------------------|-------------|------------------|---------|----------------------------|----------------------------|-----------------|
| 1. | Bond Lipophilicity on substituent 3                                                                     | BL S3       | - 0.3567         | -0.6746 | 0.3629                     | 0.3629                     | 0.3627          |
|    | Radial distribution function<br>weighted by mass                                                        | RDF45m      | - 0.4758         | 14.34   | 1.430                      | 0.78667                    | 2.723           |
| 2. | Radial distribution function<br>weighted by first ionization<br>potential                               | RDF55i      | - 0.1299         | 24.57   | 1.530                      | 2.445                      | 3.765           |
| 3. | Radial distribution function<br>weighted by ionization state                                            | RDF30s      | + 0.0833         | 17.49   | 16.71                      | 6.093                      | 6.603           |
|    | Global Topological index                                                                                | JGT         | + 2.089          | 0.4308  | 0.4758                     | 0.5404                     | 0.4758          |
| 4. | Simple path, order 1                                                                                    | SP-1        | + 0.3973         | 16.02   | 4.715                      | 4.698                      | 4.715           |
| 5. | Bond Lipophilicity on substituent 4                                                                     | BL S4       | -                | 2.808   | 0.3629                     | 2.599                      | 0.3628          |
| 6. | Spectral mean absolute deviation<br>from topological distance matrix                                    | SpMAD_D     | -                | 11.27   | 8.497                      | 8.277                      | 8.497           |
| 7. | 3D topological distance-based<br>autocorrelation - lag 3 / weighted<br>by Sanderson electronegativities | TDB3e       | + 0.2843         | 23.59   | 25.39                      | 25.35                      | 24.31           |
| 8. | Dipole Y - component                                                                                    | Dipole (y)  | + 0.0575         | -20.99  | 6.079                      | 5.181                      | 0.5589          |

**Table S7:** Predictive ability evaluation of the selected QSPR models via conditions delineated in Eqs. 5 to 8.

| Model | v* | Eq. 5       | Eq. 6         |                 | Eq. 7                       |                             | Eq. 8 |       |
|-------|----|-------------|---------------|-----------------|-----------------------------|-----------------------------|-------|-------|
|       |    | $R^2_{adj}$ | $Q^2_{cv-tr}$ | $Q^2_{cv-test}$ | $\frac{(r^2 - r_o^2)}{r^2}$ | $\frac{(r^2 - r_o^2)}{r^2}$ | $k$   | $k'$  |
| I     | 5  | 0.9396      | 0.9680        | 0.9780          | 0.0537                      | 0.0299                      | 1.006 | 0.994 |
| II    | 6  | 0.9692      | 0.9936        | 0.9759          | 0.0298                      | 0.0182                      | 0.994 | 1.006 |
| III   | 7  | 0.9766      | 0.9991        | 0.9896          | 0.0028                      | 0.0048                      | 1.004 | 0.996 |
| IV    | 8  | 0.9868      | 0.9993        | 0.8741          | 0.0735                      | 0.0278                      | 1.014 | 0.985 |

**Table S8:** The k-fold cross validation (k=5, 10, 15, 20) and Leave-One-Out (LOO) method by applying k=22 for the entire dataset of 22 phenolic compounds.

|             | <b>Model I</b>               | <b>Model II</b>              | <b>Model III</b>             | <b>Model IV</b>              |
|-------------|------------------------------|------------------------------|------------------------------|------------------------------|
| <b>k=5</b>  | $R^2_{k\text{-fold}}=0.8805$ | $R^2_{k\text{-fold}}=0.9513$ | $R^2_{k\text{-fold}}=0.9538$ | $R^2_{k\text{-fold}}=0.9432$ |
|             | RMSE = 0.1492                | RMSE=0.1073                  | RMSE=0.0898                  | RMSE=0.0898                  |
| <b>k=10</b> | $R^2_{k\text{-fold}}=0.8580$ | $R^2_{k\text{-fold}}=0.9651$ | $R^2_{k\text{-fold}}=0.9339$ | $R^2_{k\text{-fold}}=0.9637$ |
|             | RMSE = 0.1492                | RMSE=0.1073                  | RMSE=0.0898                  | RMSE=0.0898                  |
| <b>k=15</b> | $R^2_{k\text{-fold}}=0.8602$ | $R^2_{k\text{-fold}}=0.9617$ | $R^2_{k\text{-fold}}=0.9519$ | $R^2_{k\text{-fold}}=0.9570$ |
|             | RMSE = 0.1492                | RMSE=0.1073                  | RMSE=0.0898                  | RMSE=0.0898                  |
| <b>k=20</b> | $R^2_{k\text{-fold}}=0.8541$ | $R^2_{k\text{-fold}}=0.9638$ | $R^2_{k\text{-fold}}=0.9425$ | $R^2_{k\text{-fold}}=0.9553$ |
|             | RMSE = 0.1492                | RMSE=0.1073                  | RMSE=0.0898                  | RMSE=0.0898                  |
| <b>k=22</b> | $R^2_{k\text{-fold}}=0.9456$ | $R^2_{k\text{-fold}}=0.9625$ | $R^2_{k\text{-fold}}=0.9541$ | $R^2_{k\text{-fold}}=0.9369$ |
|             | RMSE = 0.1492                | RMSE=0.1073                  | RMSE=0.0898                  | RMSE=0.1405                  |

**Note:** Leave-One-Out (LOO) methodology was carried out using the k-fold cross validation (when k=22) for the entire dataset with 22 members. The k-fold cross validation is available at JMPv13 statistical software.
